# Supplementary material for: Responses of vegetation cover to hydro-climatic variations in Bosten Lake Watershed, NW China
Source: Front Plant Sci. 2024 Apr 16;15:1323445. doi: 10.3389/fpls.2024.1323445 (PMC11058830; doi:10.3389/fpls.2024.1323445)
Supplement: Supplementary Table 1 — Time-Lag and time-accumulation correlation analysis combination. [file Table_1.xlsx]

## Sheet: Sheet1
Accumulative time (month)	Lag time (month)
	Lag 0	Lag 1	Lag 2	Lag 3
Accumulation 0	Water level (area) : 1 ~ n	Water level (area) : 2 ~ n	Water level (area) : 3 ~ n	Water level (area) : 4 ~ n
	Variable: 1 ~ n	Variable: 1 ~ n-1	Variable: 1 ~ n-2	Variable: 1 ~ n-3
Accumulation 1	Water level (area) : 2 ~ n	Water level (area) : 3 ~ n	Water level (area) : 4 ~ n	-
	Variable: (1, 2) ~ (n-1, n)	Variable: (1, 2) ~ (n-2, n-1)	Variable: (1, 2) ~ (n-3, n-2)	-
Accumulation 2	Water level (area) : 3 ~ n	Water level (area) : 4 ~ n	-	-
	Variable: (1, 2, 3) ~ (n-2, n-1, n)	Variable: (1, 2, 3) ~ (n-3, n-2, n-1)	-	-
Accumulation 3	Water level (area) : 4 ~ n	-	-	-
	Variable:(1, 2, 3, 4) ~ (n-3, n-2, n-1, n)	-	-	-
* We conducted calculations from October 2002 to December 2020, a total of 219 months of each variable; n represents the length of time, in this paper, the variable “n” encompassed a range from 1 to 219.
