# Supplementary material for: Responses of vegetation cover to hydro-climatic variations in Bosten Lake Watershed, NW China
Source: Front Plant Sci. 2024 Apr 16;15:1323445. doi: 10.3389/fpls.2024.1323445 (PMC11058830; doi:10.3389/fpls.2024.1323445)
Supplement: Supplementary Table 2 — Correlation coefficient statistics of raw data. [file Table_2.xlsx]

## Sheet: Sheet1
	R	P Value
NDVI - Precipitation	0.82	<0.001
NDVI - Temperature	0.9	<0.001
Water level - Precipitation	0.06	0.39
Water level - Temperature	0.09	0.19
Water level - NDVI	0.09	0.2
Area - Precipitation	0.07	0.32
Area - Temperature	0.1	0.16
Area - NDVI	0.09	0.17
