# Supplementary material for: Responses of vegetation cover to hydro-climatic variations in Bosten Lake Watershed, NW China
Source: Front Plant Sci. 2024 Apr 16;15:1323445. doi: 10.3389/fpls.2024.1323445 (PMC11058830; doi:10.3389/fpls.2024.1323445)
Supplement: Supplementary Table 3 — Results of partial correlation and time-lag (-accumulation) analysis. [file Table_3.xlsx]

## Sheet: Sheet1
Cannual	R	P Value	Time - lag& Time - accumulation (month)
Water Level - Precipiration	0.278	3.74e-05	3-0
Water Levle - Temperature	0.352	1.04e-07	0-0
Water Level - NDVI	-0.158	0.021	0-3
Area - Precipitaion	0.234	0.0005	3-0
Area - Temperature	0.44	1.11e-11	0-0
Area - NDVI	-0.284	2.41e-05	0-3
Cinterannual	R	P Value	Time - lag& Time - accumulation (month)
Water Level - Precipiration	0.147	0.031	0-3
Water Levle - Temperature	0.218	0.001	3-0
Water Level - NDVI	-0.155	0.0221	0-0
Area - Precipitaion	0.193	0.005	0-3
Area - Temperature	0.21	0.002	3-0
Area - NDVI	0.142	0.0369	0-0
*Only count the data that P passed the 0.05 significance test, time - lag & time - accumulation (month) refers to the maximum partial correlation coefficient (absolute value)
